# Supplementary material for: Efficacy of Adaptogens in Patients with Long COVID-19: A Randomized, Quadruple-Blind, Placebo-Controlled Trial
Source: Pharmaceuticals (Basel). 2022 Mar 11;15(3):345. doi: 10.3390/ph15030345 (PMC8953947; doi:10.3390/ph15030345)
Supplement: Supplementary file 1 [file pharmaceuticals-15-00345-s001.zip › pharmaceuticals-1619360-supplementary/Supplement S1. ADAPT 232_Chisan in Long COVID.xlsx]

## Sheet: All in ONE Entry Nr
																																	Difference Day x - Day 1
Trial related assignments			Demographic data							Day 1	Day 7	Day 14	Day 21			Days after Hospitalization		Start of symptoms,weeks	Compleance	Duration of simptoms	Duratuion mean			Day 1	Day 3	Day 5	Day 7	Day 9	Day 11	Day 14	Day 21	Duration,day	1	3	5	7	9	11	14	21			Day 1	Day 3	Day 5	Day 7	Day 9	Day 11	Day 14
Entry Number	Treatment	Code	Patient Name	Gender	Age	Height	Weight	BMI	Screening Date	Visit 1	Visit 2	Visit 3	Visit 4	Finish Date	Dropout Date		Start of symptoms, days		%	days		Code		Visit 1			Visit 2			Visit 3	Visit 4										Code		Visit 1			Visit 2			Visit 3
1	A	1	MarKar	F	66	162	80	30.4832	2021-04-19	2021-04-19	2021-04-26	2021-05-03	2021-05-10	2021-05-10		88	20	2.85714	100	100	12.5	1	Fatigue	2	2	2	2	1	1	1	0	14	0	0	0	0	-1	-1	-1	-2	1	Headache	2	2	2	2	1	1	1
2	A	2	IriKar	F	64	162	90	34.2936	2021-04-19	2021-04-19	2021-04-26	2021-05-03	2021-05-10	2021-05-10		85	18	2.57143	103.1	70	8.75	2	Fatigue	2	2	2	2	1	3	3	0	14	0	0	0	0	-1	1	1	-2	2	Headache	2	2	2	2	1	2	2
3	B	3	MikGio	M	26	182	80	24.1517	2021-04-21	2021-04-21	2021-04-27	2021-05-04	2021-05-11	2021-05-11		75	21	3	100	32	4	3	Fatigue	2	1	1	1	0	0	0	0	7	0	-1	-1	-1	-2	-2	-2	-2	3	Headache	2	2	2	1	1	1	0
4	B	4	IrmGio	F	49	157	64	25.9645	2021-04-21	2021-04-21	2021-04-27	2021-05-04	2021-05-11	2021-05-11		50	25	3.57143	100	55	6.875	4	Fatigue	1	1	1	0	0	0	0	0	5	0	0	0	-1	-1	-1	-1	-1	4	Headache	0	0	0	0	0	0	0
5	B	5	GioMga	M	49	173	74	24.7252	1900-01-21	2021-04-21	2021-04-27	2021-05-04	2021-05-11	2021-05-11		51	20	2.85714	100	41	5.125	5	Fatigue	1	1	0	0	1	0	0	0	9	0	0	-1	-1	0	-1	-1	-1	5	Headache	1	1	0	0	1	1	0
6	B	6	NaiLat	F	58	166	72	26.1286	2021-04-21	2021-04-21	2021-04-27	2021-05-04	2021-05-11	2021-05-11		51	17	2.42857	100	109	13.625	6	Fatigue	2	2	2	2	1	1	1	1	21	0	0	0	0	-1	-1	-1	-1	6	Headache	2	2	2	2	2	2	2
7	B	7	NatJaj	F	68	157	90	36.5126	2021-04-21	2021-04-21	2021-04-27	2021-05-04	2021-05-11	2021-05-11		88	22	3.14286	100	35	4.375	7	Fatigue	2	2	2	2	2	1	1	0	14	0	0	0	0	0	-1	-1	-2	7	Headache	0	0	0	0	0	0	0
8	A	8	NatKup	F	35	168	52	18.424	2021-04-21	2021-04-21	2021-04-27	2021-05-04	2021-05-11	2021-05-11		88	18	2.57143	100	64	8	8	Fatigue	2	2	2	2	1	1	0	0	11	0	0	0	0	-1	-1	-2	-2	8	Headache	1	1	1	1	0	0	0
9	A	9	TamMeg	F	47	162	53	20.1951	2021-04-21	2021-04-21	2021-04-27	2021-05-04	2021-05-11	2021-05-11		33	16	2.28571	100	22	2.75	9	Fatigue	2	2	1	1	1	1	0	0	11	0	0	-1	-1	-1	-1	-2	-2	9	Headache	1	1	1	1	1	1	0
10	B	10	NinKir	F	49	166	92	33.3866	2021-04-22	2021-04-22	2021-04-28	2021-05-05	2021-05-12	2021-05-12		81	22	3.14286	100	52	6.5	10	Fatigue	3	3	2	2	1	0	0	0	9	0	0	-1	-1	-2	-3	-3	-3	10	Headache	2	3	3	1	0	0	0
11	A	11	DiaShu	F	43	162	78	29.7211	2021-04-22	2021-04-22	2021-04-28	2021-05-05	2021-05-12	2021-05-12		45	18	2.57143	105.3	60	7.5	11	Fatigue	3	3	2	2	2	1	0	0	11	0	0	-1	-1	-1	-2	-3	-3	11	Headache	1	1	1	0	0	0	0
12	B	12	EkaGig	F	43	164	81	30.116	2021-04-22	2021-04-22	2021-04-28	2021-05-05	2021-05-12	2021-05-12		41	42	6	100	80	10	12	Fatigue	0	2	1	1	1	1	1	0	14	0	2	1	1	1	1	1	0	12	Headache	2	2	1	1	1	0	0
13	B	13	NanaAsa	F	72	160	85	33.2031	2021-04-22	2021-04-22	2021-04-28	2021-05-05	2021-05-12	2021-05-12		78	22	3.14286	100	74	9.25	13	Fatigue	3	3	2	2	2	2	1	1	21	0	0	-1	-1	-1	-1	-2	-2	13	Headache	1	1	1	1	0	0	0
14	A	14	LalGel	F	49	170	85	29.4118	2021-04-22	2021-04-22	2021-04-28	2021-05-05	2021-05-12	2021-05-12		30	10	1.42857	100	39	4.875	14	Fatigue	1	1	1	1	0	0	0	0	7	0	0	0	0	-1	-1	-1	-1	14	Headache	0	0	0	0	0	0	0
15	B	15	NelIlu	F	71	165	71	26.079	2021-04-23	2021-04-23	2021-04-29	2021-05-06	2021-05-13	2021-05-13		39	42	6	100	44	5.5	15	Fatigue	2	2	2	1	1	1	1	0	14	0	0	0	-1	-1	-1	-1	-2	15	Headache	2	1	1	1	1	0	0
16	A	16	NinDar	F	60	168	95	33.6593	2021-04-26	2021-04-26	2021-05-03	2021-05-10	2021-05-17	2021-05-17		56	17	2.42857	100	33	4.125	16	Fatigue	1	1	1	1	1	0	0	0	9	0	0	0	0	0	-1	-1	-1	16	Headache	1	1	0	0	0	0	0
17	A	17	NinPar	F	51	173	86	28.7347	2021-04-27	2021-04-27	2021-05-03	2021-05-10	2021-05-17	2021-05-17		30	15	2.14286	100	67	8.375	17	Fatigue	2	2	2	1	1	1	1	1	21	0	0	0	-1	-1	-1	-1	-1	17	Headache	2	2	2	2	1	1	1
18	B	18	EleKha	F	19	177	68	21.7051	2021-04-27	2021-04-27	2021-05-03	2021-05-10	2021-05-17	2021-05-17		31	32	4.57143	100	57	7.125	18	Fatigue	2	2	2	2	2	1	1	1	21	0	0	0	0	0	-1	-1	-1	18	Headache	1	1	1	1	1	1	0
19	B	19	DavKha	M	56	180	116	35.8025	2021-04-27	2021-04-27	2021-05-03	2021-05-10	2021-05-17	2021-05-17		30	31	4.42857	100	56	7	19	Fatigue	2	2	2	1	1	1	1	1	21	0	0	0	-1	-1	-1	-1	-1	19	Headache	1	1	1	1	1	1	1
20	A	20	MarGug	F	56	166	77	27.9431	2021-05-13	2021-05-13	2021-05-19	2021-05-26	2021-06-02	2021-06-02		30	32	4.57143	100	53	6.625	20	Fatigue	1	1	1	1	1	1	0	0	11	0	0	0	0	0	0	-1	-1	20	Headache	0	0	0	0	0	0	0
21	B	21	MadGva	F	43	165	70	25.7117	2021-05-21	2021-05-21	2021-05-27	2021-06-03	2021-06-10	2021-06-10		20	22	3.14286	100	56	7	21	Fatigue	1	1	1	1	1	1	0	0	11	0	0	0	0	0	0	-1	-1	21	Headache	2	2	2	2	2	1	1
22	B	22	NatOta	F	41	172	100	33.8021	2021-05-28	2021-05-28	2021-06-03	2021-06-10	2021-06-17	2021-06-17		11	12	1.71429	100	64	8	22	Fatigue	2	2	2	1	1	1	1	0	14	0	0	0	-1	-1	-1	-1	-2	22	Headache	1	1	1	1	1	1	0
23	A	23	TsiShe	F	61	162	87	33.1504	2021-06-21	2021-06-21	2021-06-28	2021-07-05	2021-07-12	2021-07-12		35	36	5.14286	100	77	9.625	23	Fatigue	3	3	3	2	1	1	1	0	14	0	0	0	-1	-2	-2	-2	-3	23	Headache	1	1	1	0	0	0	0
24	B	24	EvaTsa	F	37	160	50	19.5312	2021-06-28	2021-06-28	2021-07-05	2021-07-12	2021-07-19	2021-07-19		20	22	3.14286	100	50	6.25	24	Fatigue	1	1	1	1	1	0	0	0	9	0	0	0	0	0	-1	-1	-1	24	Headache	1	1	1	1	1	0	0
25	A	25	ManVak	F	59	160	69	26.9531	2021-07-06	2021-07-06	2021-07-12	2021-07-19	2021-07-26	2021-07-26		28	30	4.28571	100	98	12.25	25	Fatigue	2	2	2	2	2	2	2	1	21	0	0	0	0	0	0	0	-1	25	Headache	1	1	1	1	1	1	1
26	A	26	MaiGas	F	44	160	68	26.5625	2021-07-06	2021-07-06	2021-07-12	2021-07-19	2021-07-26	2021-07-26		51	53	7.57143	100	105	13.125	26	Fatigue	3	3	2	2	2	2	1	1	21	0	0	-1	-1	-1	-1	-2	-2	26	Headache	2	2	2	1	1	1	1
27	B	27	AidAma	F	26	164	58	21.5645	2021-07-06	2021-07-06	2021-07-12	2021-07-19	2021-07-26	2021-07-26		44	45	6.42857	100	98	12.25	27	Fatigue	3	3	2	2	2	1	1	1	21	0	0	-1	-1	-1	-2	-2	-2	27	Headache	3	3	2	2	2	1	1
28	A	28	MarCho	F	47	163	65	24.4646	2021-07-06	2021-07-06	2021-07-12	2021-07-19	2021-07-26	2021-07-26		25	26	3.71429	100	98	12.25	28	Fatigue	2	2	2	2	2	1	1	1	21	0	0	0	0	0	-1	-1	-1	28	Headache	1	1	1	1	1	1	1
29	B	29	TeoSul	F	33	162	62	23.6244	2021-07-06	2021-07-06	2021-07-12	2021-07-19	2021-07-26	2021-07-26		15	16	2.28571	100	77	9.625	29	Fatigue	1	1	1	1	1	1	1	0	14	0	0	0	0	0	0	0	-1	29	Headache	0	0	0	0	0	0	0
30	B	30	LelQar	F	45	161	68	26.2336	2021-07-06	2021-07-06	2021-07-12	2021-07-19	2021-07-26	2021-07-26		23	25	3.57143	100	77	9.625	30	Fatigue	1	1	1	1	1	1	1	0	14	0	0	0	0	0	0	0	-1	30	Headache	0	0	0	0	0	0	0
31	A	31	NinMam	F	22	164	56	20.8209	2021-07-06	2021-07-06	2021-07-12	2021-07-19	2021-07-26	2021-07-26		29	31	4.42857	100	77	9.625	31	Fatigue	2	1	1	1	1	1	1	1	21	0	-1	-1	-1	-1	-1	-1	-1	31	Headache	0	0	0	0	0	0	0
32	A	32	ZinMgo	F	63	161	76	29.3199	2021-07-13	2021-07-13	2021-07-19	2021-07-26	2021-08-02	2021-08-02		28	15	2.14286	100	77	9.625	32	Fatigue	2	2	2	2	2	2	1	1	21	0	0	0	0	0	0	-1	-1	32	Headache	1	1	1	1	1	1	1
33	A	33	TamApt	F	30	163	67	25.2174	2021-07-16	2021-07-16	2021-07-22	2021-07-29	2021-08-05	2021-08-05		25	28	4	100	90	11.25	33	Fatigue	2	2	2	2	2	2	1	1	21	0	0	0	0	0	0	-1	-1	33	Headache	1	1	1	1	1	1	0
34	A	34	GioGab	M	31	176	89	28.7319	2021-07-16	2021-07-16	2021-07-22	2021-07-29	2021-08-05	2021-08-05		24	25	3.57143	100	84	10.5	34	Fatigue	2	2	2	2	2	1	1	1	21	0	0	0	0	0	-1	-1	-1	34	Headache	1	1	1	1	1	1	1
35	A	35	JulGri	F	59	165	70	25.7117	2021-07-20	2021-07-20	2021-07-26	2021-08-02	2021-08-09	2021-08-09		18	20	2.85714	100	49	6.125	35	Fatigue	1	1	1	1	1	1	0	0	11	0	0	0	0	0	0	-1	-1	35	Headache	1	1	1	1	0	0	0
36	A	36	NinMch	F	52	170	82	28.3737	2021-07-23	2021-07-23	DROPOUT	DROPOUT	DROPOUT	DROPOUT	2021-07-24	15	15	2.14286	100	0	0	36	Fatigue											0	0	0	0	0	0	0	36	Headache
37	B	37	TamAzv	F	27	158	78	31.245	2021-07-23	2021-07-23	2021-07-29	2021-08-05	2021-08-12	2021-08-12		15	15	2.14286	100	64	8	37	Fatigue	2	2	1	1	1	1	0	0	11	0	0	-1	-1	-1	-1	-2	-2	37	Headache	1	1	1	1	2	1	1
38	B	38	MaiRog	F	47	165	52	19.1001	2021-07-23	2021-07-23	2021-07-29	2021-08-05	2021-08-12	2021-08-12		20	30	4.28571	100	33	4.125	38	Fatigue	2	2	1	1	1	0	0	0	9	0	0	-1	-1	-1	-2	-2	-2	38	Headache	2	2	1	0	0	0	0
39	B	39	NatCho	F	74	167	105	37.6493	2021-07-23	2021-07-23	2021-07-29	2021-08-05	2021-08-12	2021-08-12		45	47	6.71429	100	56	7	39	Fatigue	2	2	2	1	1	1	0	0	11	0	0	0	-1	-1	-1	-2	-2	39	Headache	1	1	0	0	0	0	0
40	A	40	NarJug	F	72	172	107	36.1682	2021-07-26	2021-07-26	2021-08-02	2021-08-09	2021-08-16	2021-08-16		26	27	3.85714	100	56	7	40	Fatigue	2	2	2	1	1	1	0	0	11	0	0	0	-1	-1	-1	-2	-2	40	Headache	1	1	1	0	0	0	0
41	B	41	AllGas	F	41	167	70	25.0995	2021-07-27	2021-07-27	2021-08-02	2021-08-09	2021-08-16	2021-08-16		20	5	0.714286	100	47	5.875	41	Fatigue	2	2	1	1	1	0	0	0	9	0	0	-1	-1	-1	-2	-2	-2	41	Headache	1	1	1	1	1	0	1
42	A	42	MarZak	F	47	170	80	27.6817	2021-07-29	2021-07-29	2021-08-04	2021-08-11	2021-08-18	2021-08-18		16	15	2.14286	103.1	84	10.5	42	Fatigue	2	2	1	1	0	0	0	0	7	0	0	-1	-1	-2	-2	-2	-2	42	Headache	1	1	1	1	1	1	1
43	A	43	IloAnd	F	34	167	72	25.8166	2021-07-29	2021-07-29	2021-08-04	2021-08-11	2021-08-18	2021-08-18		17	5	0.714286	100	63	7.875	43	Fatigue	1	1	2	1	2	1	0	0	11	0	0	1	0	1	0	-1	-1	43	Headache	2	2	1	2	0	0	1
44	B	44	CimMan	F	38	173	67	22.3863	2021-07-29	2021-07-29	2021-08-04	2021-08-11	2021-08-18	2021-08-18		20	22	3.14286	100	52	6.5	44	Fatigue	2	2	2	2	1	1	0	0	11	0	0	0	0	-1	-1	-2	-2	44	Headache	1	1	1	0	0	0	0
45	B	45	NanOno	F	56	164	60	22.3081	2021-07-30	2021-07-30	2021-08-05	2021-08-12	2021-08-19	2021-08-19		31	32	4.57143	100	79	9.875	45	Fatigue	1	1	1	1	1	1	1	1	21	0	0	0	0	0	0	0	0	45	Headache	0	0	0	0	0	0	0
46	B	46	ElzAsa	M	70	175	85	27.7551	2021-08-03	2021-08-03	2021-08-09	2021-08-16	2021-08-23	2021-08-23		61	19	2.71429	100	55	6.875	46	Fatigue	2	2	1	1	1	0	0	0	9	0	0	-1	-1	-1	-2	-2	-2	46	Headache	1	1	1	1	1	0	0
47	A	47	VlaDan	M	64	184	92	27.1739	2021-08-03	2021-08-03	2021-08-09	2021-08-16	2021-08-23	2021-08-23		35	15	2.14286	100	51	6.375	47	Fatigue	2	2	2	1	1	1	0	0	11	0	0	0	-1	-1	-1	-2	-2	47	Headache	2	2	2	2	2	1	1
48	B	48	QetGlo	F	37	172	70	23.6614	2021-08-10	2021-08-10	2021-08-16	2021-08-23	2021-08-30	2021-08-18		19	5	0.714286	109.3	67	8.375	48	Fatigue	2	2	1	1	1	1	0	0	11	0	0	-1	-1	-1	-1	-2	-2	48	Headache	1	1	1	1	0	0	0
49	B	49	NesQut	F	46	165	82	30.1194	2021-08-10	2021-08-10	2021-08-16	2021-08-23	2021-08-30	2021-08-18		20	5	0.714286	100	52	6.5	49	Fatigue	2	2	1	1	0	1	0	0	11	0	0	-1	-1	-2	-1	-2	-2	49	Headache	1	1	1	1	1	1	0
50	A	50	MarChu	F	66	160	95	37.1094	2021-08-11	2021-08-11	2021-08-17	2021-08-24	2021-08-31	2021-08-31		70	15	2.14286	100	88	11	50	Fatigue	1	1	1	1	1	0	0	0	9	0	0	0	0	0	-1	-1	-1	50	Headache	1	1	1	1	0	0	0
51	A	51	MedAsa	F	40	150	45	20	2021-08-11	2021-08-11	2021-08-17	2021-08-24	2021-08-31	2021-08-31		43	17	2.42857	100	48	6	51	Fatigue	1	1	1	0	0	0	0	0	5	0	0	0	-1	-1	-1	-1	-1	51	Headache	1	1	1	1	0	0	0
52	A	52	GioXod	M	36	172	85	28.7317	2021-08-12	2021-08-12	2021-08-18	2021-08-25	2021-09-01	2021-09-01		16	3	0.428571	104.2	55	6.875	52	Fatigue	1	1	1	1	1	1	0	0	11	0	0	0	0	0	0	-1	-1	52	Headache	1	1	1	1	1	0	0
53	B	53	SalBaa	F	36	165	81	29.7521	2021-08-16	2021-08-16	2021-08-23	2021-08-30	2021-09-06	2021-09-06		16	18	2.57143	100	82	10.25	53	Fatigue	2	2	2	2	2	1	1	1	21	0	0	0	0	0	-1	-1	-1	53	Headache	1	1	1	1	1	1	0
54	B	54	NinSil	F	46	165	75	27.5482	2021-08-17	2021-08-17	2021-08-23	2021-08-30	2021-09-06	2021-09-06		29	6	0.857143	104.2	64	8	54	Fatigue	2	2	2	1	1	1	0	0	11	0	0	0	-1	-1	-1	-2	-2	54	Headache	1	1	1	1	0	0	0
55	B	55	LasSik	M	21	172	84	28.3937	2021-08-17	2021-08-17	2021-08-23	2021-08-30	2021-09-06	2021-09-06		16	17	2.42857	100	50	6.25	55	Fatigue	1	1	1	1	1	0	0	0	9	0	0	0	0	0	-1	-1	-1	55	Headache	1	1	1	1	0	0	0
56	A	56	ZazChi	M	68	174	84	27.7447	2021-08-17	2021-08-17	2021-08-23	2021-08-30	2021-09-06	2021-09-06		28	15	2.14286	100	27	3.375	56	Fatigue	1	1	1	0	0	0	0	0	5	0	0	0	-1	-1	-1	-1	-1	56	Headache	1	1	1	1	0	0	0
57	A	57	NinKil	M	65	169	83	29.0606	2021-08-23	2021-08-23	2021-08-30	2021-09-06	2021-09-13	2021-09-13		49	15	2.14286	106.4	36	4.5	57	Fatigue	1	1	1	0	0	0	0	0	5	0	0	0	-1	-1	-1	-1	-1	57	Headache	1	1	1	0	0	0	0
58	A	58	LolDik	F	62	162	78	29.7211	2021-08-26	2021-08-26	2021-09-01	2021-09-08	2021-09-15	2021-09-15		34	18	2.57143	106.4	65	8.125	58	Fatigue	1	1	1	0	0	0	0	0	5	0	0	0	-1	-1	-1	-1	-1	58	Headache	1	1	0	0	0	0	0
59	A	59	NatArt	F	36	`173	80	26.7	2021-08-30	2021-08-30	2021-09-06	2021-09-13	2021-09-20	2021-09-20		25	5	0.714286	100	74	9.25	59	Fatigue	2	2	1	1	1	1	0	0	11	0	0	-1	-1	-1	-1	-2	-2	59	Headache	2	1	1	1	1	0	0
60	A	60	NatNod	F	58	167	80	28.6851	2021-08-30	2021-08-30	2021-09-06	2021-09-13	2021-09-20	2021-09-20		16	4	0.571429	100	102	12.75	60	Fatigue	2	2	2	1	1	1	0	0	11	0	0	0	-1	-1	-1	-2	-2	60	Headache	2	2	1	0	0	0	1
61	B	61	ManGog	F	60	158	72	28.8415	2021-08-30	2021-08-30	2021-09-06	2021-09-13	2021-09-20	2021-09-20		40	40	5.71429	103.1	56	7	61	Fatigue	2	2	1	1	1	1	0	0	11	0	0	-1	-1	-1	-1	-2	-2	61	Headache	1	1	1	0	0	0	0
62	B	62	RusGur	F	34	166	65	23.5883	2021-08-30	2021-08-30	2021-09-06	2021-09-13	2021-09-20	2021-09-20		30	31	4.42857	100	42	5.25	62	Fatigue	2	2	1	1	0	0	0	0	7	0	0	-1	-1	-2	-2	-2	-2	62	Headache	2	1	1	0	0	0	0
63	B	63	NatQis	F	44	162	76	28.959	2021-08-30	2021-08-30	2021-09-06	2021-09-13	2021-09-20	2021-09-20		17	18	2.57143	100	23	2.875	63	Fatigue	1	1	1	1	0	0	0	0	7	0	0	0	0	-1	-1	-1	-1	63	Headache	1	1	0	0	0	0	0
64	B	64	GulNik	F	48	167	70	25.0995	2021-08-31	2021-08-31	2021-09-06	2021-09-13	2021-09-20	2021-09-20		33	34	4.85714	100	37	4.625	64	Fatigue	2	2	2	1	1	1	0	0	11	0	0	0	-1	-1	-1	-2	-2	64	Headache	1	1	1	0	0	0	0
65	A	65	EkaAra	F	45	167	70	25.0995	2021-09-01	2021-09-01	2021-09-07	2021-09-14	2021-09-21	2021-09-21		16	17	2.42857	105.3	56	7	65	Fatigue	2	2	2	1	1	1	0	0	11	0	0	0	-1	-1	-1	-2	-2	65	Headache	1	1	1	0	0	0	0
66	A	66	NinTop	F	38	162	72	27.4348	2021-09-02	2021-09-02	2021-09-08	2021-09-15	2021-09-22	2021-09-22		20	21	3	100	35	4.375	66	Fatigue	2	2	1	1	1	0	0	0	9	0	0	-1	-1	-1	-2	-2	-2	66	Headache	1	1	1	1	0	0	0
67	A	67	MarBil	F	45	170	73	25.2595	2021-09-02	2021-09-02	2021-09-08	2021-09-15	2021-09-22	2021-09-22		20	11	1.57143	103.1	64	8	67	Fatigue	2	2	1	1	1	1	0	0	11	0	0	-1	-1	-1	-1	-2	-2	67	Headache	1	1	1	1	2	1	1
68	A	68	ElvKep	F	68	167	70	25.0995	2021-09-02	2021-09-02	2021-09-08	2021-09-15	2021-09-22	2021-09-22		20	11	1.57143	100	64	8	68	Fatigue	2	2	1	1	1	1	0	0	11	0	0	-1	-1	-1	-1	-2	-2	68	Headache	1	1	1	1	2	1	1
69	B	69	MakJan	F	39	170	60	20.7612	2021-09-02	2021-09-02	2021-09-08	2021-09-15	2021-09-22	2021-09-22		24	25	3.57143	103.1	68	8.5	69	Fatigue	1	1	1	1	1	0	0	0	9	0	0	0	0	0	-1	-1	-1	69	Headache	2	2	1	1	1	1	1
70	B	70	ManQin	F	71	157	65	26.3702	2021-09-02	2021-09-02	2021-09-08	2021-09-15	2021-09-22	2021-09-22		16	17	2.42857	111.1	101	12.625	70	Fatigue	2	2	2	1	1	1	1	0	14	0	0	0	-1	-1	-1	-1	-2	70	Headache	2	2	1	1	1	0	0
71	B	71	IaaArs	F	39	163	50	18.8189	2021-09-03	2021-09-03	2021-09-09	2021-09-16	2021-09-23	2021-09-23		40	40	5.71429	100	121	15.125	71	Fatigue	3	3	3	2	2	2	2	2	21	0	0	0	-1	-1	-1	-1	-1	71	Headache	1	1	1	1	2	3	3
72	B	72	MziRom	F	72	166	54	19.5965	2021-09-06	2021-09-06	2021-09-13	2021-09-20	2021-09-27	2021-09-27		28	29	4.14286	100	48	6	72	Fatigue	3	2	1	1	1	1	1	1	21	0	-1	-2	-2	-2	-2	-2	-2	72	Headache	2	1	1	1	1	0	0
73	B	73	LilTal	F	31	158	47	18.8271	2021-09-06	2021-09-06	2021-09-13	2021-09-20	2021-09-27	2021-09-27		42	15	2.14286	100	56	7	73	Fatigue	2	2	2	1	1	1	0	0	11	0	0	0	-1	-1	-1	-2	-2	73	Headache	1	1	1	0	0	0	0
74	A	74	KriAda	F	47	167	72	25.8166	2021-09-06	2021-09-06	2021-09-13	2021-09-20	2021-09-27	2021-09-27		28	29	4.14286	100	49	6.125	74	Fatigue	1	1	1	1	1	1	0	0	11	0	0	0	0	0	0	-1	-1	74	Headache	1	1	1	1	0	0	0
75	A	75	MarOlq	F	36	162	70	26.6728	2021-09-07	2021-09-07	2021-09-13	2021-09-20	2021-09-27	2021-09-27		35	16	2.28571	103.1	58	7.25	75	Fatigue	2	2	1	1	1	0	0	0	9	0	0	-1	-1	-1	-2	-2	-2	75	Headache	2	2	1	1	1	0	0
76	B	76	ShoGel	F	35	163	66	24.841	2021-09-15	2021-09-15	2021-09-21	2021-09-28	2021-10-05	2021-10-05		30	31	4.42857	100	60	7.5	76	Fatigue	2	2	2	2	2	1	1	0	14	0	0	0	0	0	-1	-1	-2	76	Headache	0	0	0	0	0	0	0
77	A	77	TeiBli	M	42	184	82	24.2202	2021-09-15	2021-09-15	2021-09-21	2021-09-28	2021-10-05	2021-10-05		37	39	5.57143	100	70	8.75	77	Fatigue	1	1	1	1	1	1	1	0	14	0	0	0	0	0	0	0	-1	77	Headache	0	0	0	0	0	0	0
78	A	78	TamSam	F	46	173	85	28.4005	2021-09-16	2021-09-16	2021-09-22	2021-09-29	2021-10-06	2021-10-06		31	17	2.42857	100	41	5.125	78	Fatigue	2	2	1	1	0	0	0	0	7	0	0	-1	-1	-2	-2	-2	-2	78	Headache	2	2	2	1	1	0	0
79	A	79	EteCkh	F	38	162	58	22.1003	2021-09-20	2021-09-20	2021-09-27	2021-10-04	2021-10-11	2021-10-11		30	15	2.14286	100	60	7.5	79	Fatigue	1	1	1	1	0	0	0	0	7	0	0	0	0	-1	-1	-1	-1	79	Headache	1	1	1	0	0	0	0
80	B	80	IneLor	F	38	167	80	28.6851	2021-09-20	2021-09-20	2021-09-27	2021-10-04	2021-10-11	2021-10-11		24	25	3.57143	100	67	8.375	80	Fatigue	2	2	2	1	1	1	0	0	11	0	0	0	-1	-1	-1	-2	-2	80	Headache	1	1	1	0	0	0	0
81	A	81	TamMac	F	47	168	58	20.5499	2021-09-20	2021-09-20	2021-09-27	2021-10-04	2021-10-11	2021-10-11		28	20	2.85714	100	40	5	81	Fatigue	2	2	1	1	1	0	0	0	9	0	0	-1	-1	-1	-2	-2	-2	81	Headache	1	1	0	0	1	0	0
82	A	82	MaiKar	F	56	165	76	27.9155	2021-09-22	2021-09-22	2021-09-28	2021-10-05	2021-10-12	2021-10-12		25	12	1.71429	102	50	6.25	82	Fatigue	1	1	1	1	1	0	0	0	9	0	0	0	0	0	-1	-1	-1	82	Headache	1	1	1	1	0	0	0
83	B	83	NinDza	F	61	170	70	24.2215	2021-09-23	2021-09-23	2021-09-29	2021-10-06	2021-10-13	2021-10-13		20	10	1.42857	100	55	6.875	83	Fatigue	1	1	1	1	1	1	0	0	11	0	0	0	0	0	0	-1	-1	83	Headache	1	1	1	1	1	0	0
84	B	84	MatIos	F	59	171	78	26.6749	2021-09-27	2021-09-27	2021-10-04	2021-10-11	2021-10-18	2021-10-18		29	17	2.42857	108.7	61	7.625	84	Fatigue	1	1	1	1	0	0	0	0	7	0	0	0	0	-1	-1	-1	-1	84	Headache	1	1	1	1	0	0	0
85	A	85	LalOga	F	51	176	77	24.858	2021-09-27	2021-09-27	2021-10-04	2021-10-11	2021-10-18	2021-10-18		38	17	2.42857	100	52	6.5	85	Fatigue	2	2	1	1	0	1	0	0	11	0	0	-1	-1	-2	-1	-2	-2	85	Headache	1	1	1	1	1	1	0
86	A	86	MziJav	F	51	169	53	18.5568	2021-09-30	2021-09-30	2021-10-06	2021-10-13	2021-10-20	2021-10-20		78	17	2.42857	100	61	7.625	86	Fatigue	1	1	1	1	1	0	0	0	9	0	0	0	0	0	-1	-1	-1	86	Headache	1	1	1	1	1	1	0
87	B	87	ManQar	F	56	158	64	25.6369	2021-09-30	2021-09-30	2021-10-06	2021-10-13	2021-10-20	2021-10-20		33	20	2.85714	100	59	7.375	87	Fatigue	1	1	1	1	0	0	0	0	7	0	0	0	0	-1	-1	-1	-1	87	Headache	1	1	1	1	0	0	0
88	A	88	Susum	F	66	162	75	28.578	2021-10-04	2021-10-04	2021-10-10	2021-10-17	2021-10-24	2021-10-24		41	20	2.85714	100	74	9.25	88	Fatigue	2	2	1	1	1	1	0	0	11	0	0	-1	-1	-1	-1	-2	-2	88	Headache	2	1	1	1	1	0	0
89	A	89	KhaCho	F	41	155	68	28.3039	2021-10-07	2021-10-07	2021-10-13	2021-10-20	2021-10-27	2021-10-27		22	17	2.42857	106.4	62	7.75	89	Fatigue	1	1	1	1	1	1	0	0	11	0	0	0	0	0	0	-1	-1	89	Headache	1	1	1	0	0	0	0
90	A	90	NatKkh	F	42	163	70	26.3465	2021-10-15	2021-10-15	2021-10-21	2021-10-28	2021-11-04	2021-11-04		28	17	2.42857	100	41	5.125	90	Fatigue	2	2	2	2	1	1	1	1	21	0	0	0	0	-1	-1	-1	-1	90	Headache	2	2	1	1	1	0	0
91	A	91	TamKok	F	21	161	55	21.2183	2021-10-15	2021-10-15	2021-10-21	2021-10-28	2021-11-04	2021-11-04		30	15	2.14286	100	52	6.5	91	Fatigue	2	2	2	2	1	1	1	0	14	0	0	0	0	-1	-1	-1	-2	91	Headache	2	2	1	1	1	1	1
92	B	92	GerKhu	M	81	168	91	32.2421	2021-10-15	2021-10-15	2021-10-21	2021-10-28	2021-11-04	2021-11-04		35	20	2.85714	100	51	6.375	92	Fatigue	2	2	1	1	1	1	1	0	14	0	0	-1	-1	-1	-1	-1	-2	92	Headache	0	0	0	0	0	0	0
93	B	93	DalKhu	F	69	166	85	30.8463	2021-10-15	2021-10-15	2021-10-21	2021-10-28	2021-11-04	2021-11-04		32	16	2.28571	100	47	5.875	93	Fatigue	2	2	2	2	1	1	1	0	14	0	0	0	0	-1	-1	-1	-2	93	Headache	1	1	1	0	0	0	0
94	A	94	KakMan	M	47	190	93	25.7618	2021-10-18	2021-10-18	2021-10-25	2021-11-01	2021-11-08	2021-11-08		24	24	3.42857	100	48	6	94	Fatigue	1	1	1	1	0	0	0	0	7	0	0	0	0	-1	-1	-1	-1	94	Headache	1	1	1	0	0	0	0
95	B	95	DavAda	M	43	178	106	33.4554	2021-10-19	2021-10-19	2021-10-25	2021-11-01	2021-11-08	2021-11-08		15	16	2.28571	100	38	4.75	95	Fatigue	2	2	2	1	1	1	0	0	11	0	0	0	-1	-1	-1	-2	-2	95	Headache	1	1	1	0	0	0	0
96	A	96	JulBar	F	62	160	71	27.7344	2021-10-19	2021-10-19	2021-10-25	2021-11-01	2021-11-08	2021-11-08		12	12	1.71429	103.1	67	8.375	96	Fatigue	2	2	1	1	1	1	0	0	11	0	0	-1	-1	-1	-1	-2	-2	96	Headache	1	1	1	1	0	0	0
97	B	97	TamGio	F	46	168	77	27.2817	2021-10-20	2021-10-20	2021-10-26	2021-11-02	2021-11-09	2021-11-09		18	19	2.71429	100	67	8.375	97	Fatigue	2	2	2	2	2	1	1	1	21	0	0	0	0	0	-1	-1	-1	97	Headache	0	0	0	0	0	0	0
98	B	98	IriArc	F	48	161	71	27.3909	2021-10-20	2021-10-20	2021-10-26	2021-11-02	2021-11-09	2021-11-09		15	16	2.28571	100	60	7.5	98	Fatigue	2	2	2	2	2	1	1	1	21	0	0	0	0	0	-1	-1	-1	98	Headache	0	0	0	0	0	0	0
99	B	99	MarGac	F	67	168	70	24.8016	2021-10-22	2021-10-22	2021-10-28	2021-11-04	2021-11-11	2021-11-11		15	17	2.42857	100	77	9.625	99	Fatigue	2	2	2	2	1	1	1	0	14	0	0	0	0	-1	-1	-1	-2	99	Headache	2	2	2	1	1	1	1
100	B	100	NatCha	F	44	173	62	20.7157	2021-10-22	2021-10-22	2021-10-28	2021-11-04	2021-11-11	2021-11-11		15	17	2.42857	100	33	4.125	100	Fatigue	1	1	1	1	1	0	0	0	9	0	0	0	0	0	-1	-1	-1	100	Headache	1	1	0	0	0	0	0
																																										Ratio A/B
																																																	1.5
[truncated: 246 more columns]
